# Supplementary material for: Physiological thermal responses of three Mexican snakes with distinct lifestyles
Source: PeerJ. 2024 Jul 19;12:e17705. doi: 10.7717/peerj.17705 (PMC11262299; doi:10.7717/peerj.17705)
Supplement: Supplemental Information 1 — All studied species are presented on different sheets where ID, Sex, Body mass, Snout-Vent-Length, Treatmen and RMR or Swimming speed data is provided. [file peerj-12-17705-s001.xlsx]

## Sheet: Performance C.polystictus
Performance of Crotalus polystictus
ID	Sex	Body mass (g)	Snout–vent length (cm)	Thermal treatment (°C)	Swimming speed (cm/s)
1	NA	9.5	21.71	15	16.3636
1	NA	9.5	21.71	25	23.3766
1	NA	9.5	21.71	30	23.3766
1	NA	9.5	21.71	33	24.3243
2	NA	9.6	19.53	15	24.3243
2	NA	9.6	19.53	25	34.6154
2	NA	9.6	19.53	30	30.5085
2	NA	9.6	19.53	33	22.2222
3	NA	9.2	19.7	15	13.2353
3	NA	9.2	19.7	25	26.087
3	NA	9.2	19.7	30	30
3	NA	9.2	19.7	33	41.8605
4	NA	8.9	19.16	15	18.75
4	NA	8.9	19.16	25	32.7273
4	NA	8.9	19.16	30	31.0345
4	NA	8.9	19.16	33	30.5085
5	NA	9.2	19.89	15	8.61244
5	NA	9.2	19.89	25	20.2247
5	NA	9.2	19.89	30	26.087
5	NA	9.2	19.89	33	26.8657
6	NA	10.2	18.24	15	16.9811
6	NA	10.2	18.24	25	20.2247
6	NA	10.2	18.24	30	23.0769
6	NA	10.2	18.24	33	18.5567
7	NA	9.5	18.6	15	12.6761
7	NA	9.5	18.6	25	23.6842
7	NA	9.5	18.6	30	25.7143
7	NA	9.5	18.6	33	28.5714
8	M	138.6	56.48	15	50
8	M	138.6	56.48	25	58.0645
8	M	138.6	56.48	30	64.2857
8	M	138.6	56.48	33	72
9	F	123.9	57.82	15	33.9623
9	F	123.9	57.82	25	48.6486
9	F	123.9	57.82	30	48.6486
9	F	123.9	57.82	33	56.25
10	F	108.9	58.32	15	42.8571
10	F	108.9	58.32	25	51.4286
10	F	108.9	58.32	30	56.25
10	F	108.9	58.32	33	51.4286
11	F	142.1	55.27	15	36
11	F	142.1	55.27	25	51.4286
11	F	142.1	55.27	30	64.2857
11	F	142.1	55.27	33	54.5455
12	F	14.6	27.07	15	18.5567
12	F	14.6	27.07	25	20.2247
12	F	14.6	27.07	30	25.3521
12	F	14.6	27.07	33	32.1429
13	M	306.4	67.03	15	50
13	M	306.4	67.03	25	60
13	M	306.4	67.03	30	60
13	M	306.4	67.03	33	62.069
14	F	140.9	54.38	15	48.6486
14	F	140.9	54.38	25	60
14	F	140.9	54.38	30	75
14	F	140.9	54.38	33	69.2308
15	M	252.1	69.73	15	42.8571
15	M	252.1	69.73	25	54.5455
15	M	252.1	69.73	30	54.5455
15	M	252.1	69.73	33	56.25
16	F	11.6	25.82	15	25.7143
16	F	11.6	25.82	25	30.5085
16	F	11.6	25.82	30	31.0345
16	F	11.6	25.82	33	34.6154
17	F	144.6	50.87	15	45
17	F	144.6	50.87	25	51.4286
17	F	144.6	50.87	30	54.5455
17	F	144.6	50.87	33	48.6486
18	F	19.8	26.98	15	11.25
18	F	19.8	26.98	25	23.6842
18	F	19.8	26.98	30	24.3243
18	F	19.8	26.98	33	36.7347
19	M	18.4	29.42	15	30
19	M	18.4	29.42	25	36.7347
19	M	18.4	29.42	30	45
19	M	18.4	29.42	33	38.2979
20	F	47.9	41.04	15	14.5161
20	F	47.9	41.04	25	50
20	F	47.9	41.04	30	51.4286
20	F	47.9	41.04	33	47.3684
20	F	47.9	41.04	36	48.6486
21	F	20.2	30.71	15	36
21	F	20.2	30.71	25	46.1538
21	F	20.2	30.71	30	47.3684
21	F	20.2	30.71	33	37.5
21	F	20.2	30.71	36	54.5455
22	M	25.3	30.17	15	20.4545
22	M	25.3	30.17	25	30.5085
22	M	25.3	30.17	30	29.5082
22	M	25.3	30.17	33	29.5082
22	M	25.3	30.17	36	42.8571
23	F	19.6	30.19	15	15.7895
23	F	19.6	30.19	25	36.7347
23	F	19.6	30.19	30	41.8605
23	F	19.6	30.19	33	36.7347
23	F	19.6	30.19	36	45
24	F	68	46.91	15	25.3521
24	F	68	46.91	25	37.5
24	F	68	46.91	30	40
24	F	68	46.91	33	42.8571
24	F	68	46.91	36	66.6667
25	M	42.4	38.82	15	24.3243
25	M	42.4	38.82	25	51.4286
25	M	42.4	38.82	30	48.6486
25	M	42.4	38.82	33	48.6486
25	M	42.4	38.82	36	56.25
26	M	35.8	36.9	15	22.5
26	M	35.8	36.9	25	39.1304
26	M	35.8	36.9	30	42.8571
26	M	35.8	36.9	33	64.2857
26	M	35.8	36.9	36	42.8571
27	M	139.2	57.96	15	38.2979
27	M	139.2	57.96	25	51.4286
27	M	139.2	57.96	30	54.5455
27	M	139.2	57.96	33	66.6667
27	M	139.2	57.96	36	60
28	M	31.2	33.61	15	21.9512
28	M	31.2	33.61	25	48.6486
28	M	31.2	33.61	30	72
28	M	31.2	33.61	33	58.0645
28	M	31.2	33.61	36	46.1538
29	M	170.7	63.63	15	50
29	M	170.7	63.63	25	60
29	M	170.7	63.63	30	64.2857
29	M	170.7	63.63	33	78.2609
29	M	170.7	63.63	36	66.6667
30	F	76	54.67	15	30.5085
30	F	76	54.67	25	46.1538
30	F	76	54.67	30	48.6486
30	F	76	54.67	33	33.3333
30	F	76	54.67	36	52.9412
31	M	241.5	69.75	15	38.2979
31	M	241.5	69.75	25	62.069
31	M	241.5	69.75	30	66.6667
31	M	241.5	69.75	33	66.6667
31	M	241.5	69.75	36	90
32	F	75.4	57.89	15	25.3521
32	F	75.4	57.89	25	30.5085
32	F	75.4	57.89	30	33.3333
32	F	75.4	57.89	33	36.7347
32	F	75.4	57.89	36	54.5455
33	M	41.5	46.27	15	22.5
33	M	41.5	46.27	25	29.5082
33	M	41.5	46.27	30	39.1304
33	M	41.5	46.27	33	42.8571
33	M	41.5	46.27	36	52.9412

## Sheet: Performance C.lineata
Performance of Conopsis lineata
ID	Sex	Body mass (g)	Snout–vent length (cm)	Thermal treatment (°C)	Swimming speed (cm/s)
1	F	6.3	18.59	15	30
1	F	6.3	18.59	25	19.1489
1	F	6.3	18.59	30	26.087
1	F	6.3	18.59	33	21.6867
2	M	7.9	17.98	15	30.5085
2	M	7.9	17.98	25	32.7273
2	M	7.9	17.98	30	32.7273
2	M	7.9	17.98	33	33.9623
3	M	7	19.15	15	20.6897
3	M	7	19.15	25	21.6867
3	M	7	19.15	30	40
3	M	7	19.15	33	28.5714
4	F	7.2	19.69	15	20
4	F	7.2	19.69	25	19.5652
4	F	7.2	19.69	30	22.5
4	F	7.2	19.69	33	25
5	F	2.7	14.53	15	21.9512
5	F	2.7	14.53	25	15.7895
5	F	2.7	14.53	30	16.3636
5	F	2.7	14.53	33	21.9512
6	M	3.3	14.4	15	20.4545
6	M	3.3	14.4	25	19.5652
6	M	3.3	14.4	30	21.4286
6	M	3.3	14.4	33	30
7	F	8.8	21.64	15	13.7405
7	F	8.8	21.64	25	28.125
7	F	8.8	21.64	30	40.9091
7	F	8.8	21.64	33	26.8657
8	M	6.8	17.5	15	17.4757
8	M	6.8	17.5	25	17.8218
8	M	6.8	17.5	30	25
8	M	6.8	17.5	33	23.6842
9	M	3.3	14.84	15	11.465
9	M	3.3	14.84	25	13.3333
9	M	3.3	14.84	30	14.1732
9	M	3.3	14.84	33	15.6522
10	F	5.7	20.35	15	13.9535
10	F	5.7	20.35	25	18.9474
10	F	5.7	20.35	30	23.6842
10	F	5.7	20.35	33	25.3521
11	F	4.6	15.42	15	13.9535
11	F	4.6	15.42	25	18.9474
11	F	4.6	15.42	30	18.9474
11	F	4.6	15.42	33	31.5789
12	M	3.1	13.63	15	20.4545
12	M	3.1	13.63	25	28.5714
12	M	3.1	13.63	30	23.0769
12	M	3.1	13.63	33	30.5085
13	F	8	18.7	15	20.6897
13	F	8	18.7	25	26.087
13	F	8	18.7	30	27.2727
13	F	8	18.7	33	25.7143
14	M	5.1	15.83	15	16.5138
14	M	5.1	15.83	25	20.9302
14	M	5.1	15.83	30	20.4545
14	M	5.1	15.83	33	21.4286
15	F	6.2	17.87	15	14.876
15	F	6.2	17.87	25	16.5138
15	F	6.2	17.87	30	19.1489
15	F	6.2	17.87	33	18
16	F	2.1	11.11	15	11.3924
16	F	2.1	11.11	25	12.8571
16	F	2.1	11.11	30	15
16	F	2.1	11.11	33	15.1261
17	M	2.4	12.58	15	12.4138
17	M	2.4	12.58	25	13.2353
17	M	2.4	12.58	30	20.6897
17	M	2.4	12.58	33	24.3243
18	M	6.7	17.11	15	15.3846
18	M	6.7	17.11	25	17.6471
18	M	6.7	17.11	30	17.6471
18	M	6.7	17.11	33	19.5652
19	M	6.7	17.11	15	10.8434
19	M	6.7	17.11	25	14.0625
19	M	6.7	17.11	30	16.6667
19	M	6.7	17.11	33	13.8462
20	F	6.7	22.33	15	16.5138
20	F	6.7	22.33	25	20.6897
20	F	6.7	22.33	30	25.7143
20	F	6.7	22.33	33	43.9024
20	F	6.7	22.33	36	14.4
21	F	7.9	24.63	15	21.4286
21	F	7.9	24.63	25	36
21	F	7.9	24.63	30	31.0345
21	F	7.9	24.63	33	24.3243
21	F	7.9	24.63	36	13.3333
22	M	11.1	16.66	15	18.75
22	M	11.1	16.66	25	38.2979
22	M	11.1	16.66	30	36
22	M	11.1	16.66	33	33.3333
22	M	11.1	16.66	36	31.5789
23	M	8.8	16.13	15	20
23	M	8.8	16.13	25	28.125
23	M	8.8	16.13	30	20.6897
23	M	8.8	16.13	33	26.087
23	M	8.8	16.13	36	16.3636
24	F	5.9	19.76	15	11.25
24	F	5.9	19.76	25	13.3333
24	F	5.9	19.76	30	29.0323
24	F	5.9	19.76	33	24.3243
24	F	5.9	19.76	36	45
25	F	2.1	15.29	15	10.7143
25	F	2.1	15.29	25	12.5
25	F	2.1	15.29	30	15.5172
25	F	2.1	15.29	33	12.8571
25	F	2.1	15.29	36	15.1261
26	M	5.4	18.06	15	18
26	M	5.4	18.06	25	28.5714
26	M	5.4	18.06	30	35.2941
26	M	5.4	18.06	33	32.7273
26	M	5.4	18.06	36	35.2941
27	M	6.9	16.58	15	20.6897
27	M	6.9	16.58	25	21.4286
27	M	6.9	16.58	30	28.5714
27	M	6.9	16.58	33	26.087
27	M	6.9	16.58	36	23.6842
28	F	6.1	18.41	15	11.25
28	F	6.1	18.41	25	24.3243
28	F	6.1	18.41	30	29.0323
28	F	6.1	18.41	33	35.2941
28	F	6.1	18.41	36	43.9024
29	F	2.3	11.32	15	11.3924
29	F	2.3	11.32	25	12.8571
29	F	2.3	11.32	30	14.1732
29	F	2.3	11.32	33	15.1261
29	F	2.3	11.32	36	16.3636
30	M	5.1	14.91	15	16.5138
30	M	5.1	14.91	25	20.9302
30	M	5.1	14.91	30	21.4286
30	M	5.1	14.91	33	23.6842
30	M	5.1	14.91	36	23.6842
31	M	3.4	13.67	15	20.4545
31	M	3.4	13.67	25	21.4286
31	M	3.4	13.67	30	23.0769
31	M	3.4	13.67	33	30.5085
31	M	3.4	13.67	36	28.5714

## Sheet: Performance T.melanogaster
Performance of Thamnophis melanogaster
ID	Sex	Body mass (g)	Snout–vent length (cm)	Thermal treatment (°C)	Swimming speed (cm/s)
1	NA	2.3	16.56	15	34.6154
1	NA	2.3	16.56	25	38.2979
1	NA	2.3	16.56	30	47.3684
1	NA	2.3	16.56	33	41.8605
2	NA	3	17.98	15	41.8605
2	NA	3	17.98	25	45
2	NA	3	17.98	30	45
2	NA	3	17.98	33	47.3684
3	NA	3.1	16.28	15	26.4706
3	NA	3.1	16.28	25	54.5455
3	NA	3.1	16.28	30	32.1429
3	NA	3.1	16.28	33	40
3	NA	4.9	18.73	15	32.1429
4	NA	4.9	18.73	25	36
4	NA	4.9	18.73	30	34.6154
4	NA	4.9	18.73	33	47.3684
5	F	7.2	19.44	15	50
5	F	7.2	19.44	25	54.5455
5	F	7.2	19.44	30	60
5	F	7.2	19.44	33	38.2979
6	M	7.4	20.24	15	47.3684
6	M	7.4	20.24	25	58.0645
6	M	7.4	20.24	30	58.0645
6	M	7.4	20.24	33	33.3333
7	M	7.2	22.79	15	51.4286
7	M	7.2	22.79	25	58.0645
7	M	7.2	22.79	30	40
7	M	7.2	22.79	33	75
8	F	121.6	63	15	58.0645
8	F	121.6	63	25	81.8182
8	F	121.6	63	30	90
8	F	121.6	63	33	94.7368
9	F	108	63.9	15	60
9	F	108	63.9	25	75
9	F	108	63.9	30	81.8182
9	F	108	63.9	33	116.129
10	M	7.6	21.69	15	66.6667
10	M	7.6	21.69	25	72
10	M	7.6	21.69	30	78.2609
10	M	7.6	21.69	33	75
11	F	8.6	22.76	15	47.3684
12	F	8.6	22.76	25	47.3684
11	F	8.6	22.76	30	48.6486
11	F	8.6	22.76	33	51.4286
12	M	20.7	33.4	15	41.8605
12	M	20.7	33.4	25	54.5455
12	M	20.7	33.4	30	54.5455
12	M	20.7	33.4	33	78.2609
13	F	56.4	49.4	15	66.6667
13	F	56.4	49.4	25	85.7143
13	F	56.4	49.4	30	78.2609
13	F	56.4	49.4	33	81.8182
14	M	76.9	51.3	15	78.2609
14	M	76.9	51.3	25	85.7143
14	M	76.9	51.3	30	100
15	M	44.8	43.4	15	78.2609
15	M	44.8	43.4	25	85.7143
15	M	44.8	43.4	30	54.5455
15	M	44.8	43.4	33	78.2609
16	M	9.8	27.5	15	50
16	M	9.8	27.5	25	72
16	M	9.8	27.5	30	90
16	M	9.8	27.5	33	78.2609
17	F	91.6	59.5	33	72
18	F	36.5	44.9	15	78.2609
18	F	36.5	44.9	25	66.6667
18	F	36.5	44.9	30	100
18	F	36.5	44.9	33	85.7143
19	F	48.5	53	15	47.3684
19	F	48.5	53	25	69.2308
19	F	48.5	53	30	90
19	F	48.5	53	33	75
20	F	52.7	51	15	60
20	F	52.7	51	25	78.2609
20	F	52.7	51	30	81.8182
20	F	52.7	51	33	90
21	F	49.3	50	15	72
21	F	49.3	50	25	90
21	F	49.3	50	30	105.882
21	F	49.3	50	33	105.882
22	M	14.4	30	15	24.6575
22	M	14.4	30	25	75
22	M	14.4	30	30	72
22	M	14.4	30	33	54.5455
22	M	14.4	30	36	78.2609
23	F	25.5	38.1	15	52.9412
23	F	25.5	38.1	25	66.6667
23	F	25.5	38.1	30	72
23	F	25.5	38.1	33	81.8182
23	F	25.5	38.1	36	83.7209
24	NA	3.5	17.5	15	14.4
24	NA	3.5	17.5	25	48.6486
24	NA	3.5	17.5	30	39.1304
24	NA	3.5	17.5	33	37.5
24	NA	3.5	17.5	36	50
25	M	51	41	15	64.2857
25	M	51	41	25	72
25	M	51	41	30	75
25	M	51	41	33	100
25	M	51	41	36	78.2609
26	NA	3.6	17	15	14.876
26	NA	3.6	17	25	50
26	NA	3.6	17	30	41.8605
26	NA	3.6	17	33	46.1538
26	NA	3.6	17	36	64.2857
26	NA	2.8	15.55	15	28.5714
27	NA	2.8	15.55	25	40
27	NA	2.8	15.55	30	32.7273
27	NA	2.8	15.55	33	40.9091
27	NA	2.8	15.55	36	19.5652
28	F	5.3	17.59	15	32.4
28	F	5.3	17.59	25	46.1538
28	F	5.3	17.59	30	75
28	F	5.3	17.59	33	66.6667
28	F	5.3	17.59	36	45
29	M	26.8	38.96	15	43.9024
29	M	26.8	38.96	25	85.7143
29	M	26.8	38.96	30	94.7368
29	M	26.8	38.96	33	94.7368
29	M	26.8	38.96	36	105.882
30	NA	1.8	15.24	15	21.9512
30	NA	1.8	15.24	25	66.6667
30	NA	1.8	15.24	30	41.8605
30	NA	1.8	15.24	33	54.5455
30	NA	1.8	15.24	36	40
31	NA	3.9	16.38	15	32.1429
31	NA	3.9	16.38	25	41.8605
31	NA	3.9	16.38	30	56.25
31	NA	3.9	16.38	33	47.3684
31	NA	3.9	16.38	36	56.25
32	NA	2.5	15.29	15	30
32	NA	2.5	15.29	25	39.1304
32	NA	2.5	15.29	30	51.4286
32	NA	2.5	15.29	33	33.3333
32	NA	2.5	15.29	36	16.3636
33	NA	4.2	18.06	15	25.7143
33	NA	4.2	18.06	25	37.5
33	NA	4.2	18.06	30	43.9024
33	NA	4.2	18.06	33	54.5455
33	NA	4.2	18.06	36	42.8571
34	F	47.3	54	15	43.9024
34	F	47.3	54	25	54.5455
34	F	47.3	54	30	66.6667
34	F	47.3	54	33	90
34	F	47.3	54	36	75
35	M	74.9	52.7	15	69.2308
35	M	74.9	52.7	25	85.7143
35	M	74.9	52.7	30	85.7143
35	M	74.9	52.7	33	100
35	M	74.9	52.7	36	94.7368
36	M	20.1	32.5	15	41.8605
36	M	20.1	32.5	25	54.5455
36	M	20.1	32.5	30	64.2857
36	M	20.1	32.5	33	78.2609
36	M	20.1	32.5	36	83.7209
37	F	5.4	16.19	15	32.4
37	F	5.4	16.19	25	39.1304
37	F	5.4	16.19	30	72
37	F	5.4	16.19	33	66.6667
37	F	5.4	16.19	36	42.8571
38	F	38.1	45.8	15	66.6667
38	F	38.1	45.8	25	75
38	F	38.1	45.8	30	100
38	F	38.1	45.8	33	85.7143
38	F	38.1	45.8	36	83.7209

## Sheet: RMR C.polystictus
Resting Metabolic Rate of Crotalus polystictus
ID	Sex	Body mass (g)	Thermal treatment (°C)	Resting metabolic rate (CO2 ml/min)	log10 Body mass	log10 Resting metabolic rate
1	NA	9.5	15	0.571249	0.977724	-0.243175
1	NA	9.5	25	0.680676	0.977724	-0.167059
1	NA	9.5	30	1.89752	0.977724	0.278186
1	NA	9.5	33	1.54833	0.977724	0.189863
2	NA	9.6	15	0.411677	0.982271	-0.385443
2	NA	9.6	25	0.910222	0.982271	-0.0408525
2	NA	9.6	30	1.03465	0.982271	0.0147918
2	NA	9.6	33	1.43339	0.982271	0.156365
3	NA	9.2	15	0.397903	0.963788	-0.400223
3	NA	9.2	25	1.02687	0.963788	0.011515
3	NA	9.2	30	1.24986	0.963788	0.0968618
3	NA	9.2	33	1.58865	0.963788	0.201029
4	NA	8.9	15	0.530992	0.94939	-0.274912
4	NA	8.9	25	0.719594	0.94939	-0.142912
4	NA	8.9	30	1.16258	0.94939	0.0654236
4	NA	8.9	33	1.40309	0.94939	0.147084
5	NA	9.2	15	0.946928	0.963788	-0.023683
5	NA	9.2	25	1.02597	0.963788	0.0111338
5	NA	9.2	30	1.32754	0.963788	0.123048
5	NA	9.2	33	1.76858	0.963788	0.247625
6	NA	10.2	15	0.447069	1.0086	-0.349625
6	NA	10.2	25	1.18571	1.0086	0.0739781
6	NA	10.2	30	1.4051	1.0086	0.147708
6	NA	10.2	33	1.60441	1.0086	0.205314
7	NA	9.5	15	0.441775	0.977724	-0.354799
7	NA	9.5	25	0.805815	0.977724	-0.0937647
7	NA	9.5	30	1.37572	0.977724	0.13853
7	NA	9.5	33	1.78307	0.977724	0.251168
8	M	138.6	15	3.99426	2.14176	0.601437
8	M	138.6	25	5.00986	2.14176	0.699826
8	M	138.6	30	5.11961	2.14176	0.709237
8	M	138.6	33	11.0151	2.14176	1.04199
9	F	123.9	15	4.08916	2.09307	0.611634
9	F	123.9	25	6.24375	2.09307	0.795446
9	F	123.9	30	6.81237	2.09307	0.833298
9	F	123.9	33	8.89786	2.09307	0.949286
10	F	108.9	15	4.82738	2.03703	0.683712
10	F	108.9	25	6.1602	2.03703	0.789595
10	F	108.9	30	8.27202	2.03703	0.917611
10	F	108.9	33	9.67867	2.03703	0.985816
11	F	142.1	15	3.79965	2.15259	0.579744
11	F	142.1	25	4.30764	2.15259	0.63424
11	F	142.1	30	4.67814	2.15259	0.670073
11	F	142.1	33	10.5653	2.15259	1.02388
12	F	14.6	15	0.913209	1.16435	-0.0394298
12	F	14.6	25	1.12927	1.16435	0.0527974
12	F	14.6	30	1.46334	1.16435	0.165345
12	F	14.6	33	1.81022	1.16435	0.257731
13	F	140.9	15	4.79004	2.14891	0.680339
13	F	140.9	25	7.31198	2.14891	0.864035
13	F	140.9	30	5.02171	2.14891	0.700852
13	F	140.9	33	7.04052	2.14891	0.847605
14	M	252.1	15	11.4126	2.40157	1.05738
14	M	252.1	25	14.6687	2.40157	1.16639
14	M	252.1	30	18.5528	2.40157	1.26841
14	M	252.1	33	23.4656	2.40157	1.37043
15	F	11.6	15	0.6884	1.06446	-0.162159
15	F	11.6	25	1.08477	1.06446	0.0353377
15	F	11.6	30	1.43119	1.06446	0.155697
15	F	11.6	33	2.36922	1.06446	0.374606
16	F	144.6	25	9.89016	2.16017	0.995203
16	F	144.6	30	12.8321	2.16017	1.1083
16	F	144.6	33	13.2461	2.16017	1.12209
17	F	19.8	15	0.711412	1.29667	-0.147879
17	F	19.8	25	2.23106	1.29667	0.348512
17	F	19.8	30	1.88217	1.29667	0.274658
17	F	19.8	33	2.72794	1.29667	0.435834
18	M	18.4	15	0.668623	1.26482	-0.174819
18	M	18.4	25	1.52666	1.26482	0.183743
18	M	18.4	30	1.80419	1.26482	0.256282
18	M	18.4	33	1.71301	1.26482	0.23376
19	M	42.4	15	3.94177	1.62737	0.595691
19	M	42.4	25	4.59766	1.62737	0.662537
19	M	42.4	30	5.19902	1.62737	0.715921
19	M	42.4	33	5.65535	1.62737	0.752459
19	M	42.4	36	5.92649	1.62737	0.772798
20	M	35.8	15	1.22729	1.55388	0.0889465
20	M	35.8	25	1.73296	1.55388	0.238788
20	M	35.8	30	1.62624	1.55388	0.211184
20	M	35.8	33	2.96019	1.55388	0.47132
20	M	35.8	36	3.73065	1.55388	0.571785
21	M	139.2	15	2.83538	2.14364	0.452611
21	M	139.2	25	4.94663	2.14364	0.694309
21	M	139.2	30	6.47631	2.14364	0.811328
21	M	139.2	33	8.93907	2.14364	0.951292
21	M	139.2	36	10.7005	2.14364	1.0294
22	M	31.2	15	1.94655	1.49415	0.289266
22	M	31.2	25	2.10142	1.49415	0.322512
22	M	31.2	30	2.68753	1.49415	0.429353
22	M	31.2	33	3.55523	1.49415	0.550867
22	M	31.2	36	3.8144	1.49415	0.581426
23	M	170.7	15	8.6952	2.23223	0.93928
23	M	170.7	25	9.2337	2.23223	0.965376
23	M	170.7	30	11.4454	2.23223	1.05863
23	M	170.7	33	12.1515	2.23223	1.08463
23	M	170.7	36	16.7407	2.23223	1.22377
24	F	76	15	2.90866	1.88081	0.463692
24	F	76	25	3.28347	1.88081	0.516333
24	F	76	30	3.90486	1.88081	0.591605
24	F	76	36	5.40182	1.88081	0.73254
25	M	241.5	15	6.41359	2.38292	0.807101
25	M	241.5	25	8.10516	2.38292	0.908762
25	M	241.5	30	10.8923	2.38292	1.03712
25	M	241.5	33	13.4004	2.38292	1.12712
25	M	241.5	36	15.6909	2.38292	1.19565
26	F	34.5	15	2.78052	1.53782	0.444125
26	F	34.5	25	3.79059	1.53782	0.578706
26	F	34.5	30	3.92086	1.53782	0.593382
26	F	34.5	36	3.23598	1.53782	0.510006
27	F	62.2	15	2.12339	1.79379	0.327029
27	F	62.2	25	4.44424	1.79379	0.647798
27	F	62.2	30	4.66276	1.79379	0.668643
27	F	62.2	36	3.9814	1.79379	0.600036
28	M	148.7	15	5.07906	2.17231	0.705783
28	M	148.7	25	6.50049	2.17231	0.812946
28	M	148.7	30	10.5412	2.17231	1.02289
29	M	148.7	33	11.4846	2.17231	1.06011
28	M	148.7	36	13.7928	2.17231	1.13965
28	M	102.4	15	3.84127	2.0103	0.584475
29	M	102.4	25	5.90508	2.0103	0.771226
29	M	102.4	30	6.04811	2.0103	0.78162
30	M	102.4	33	7.07075	2.0103	0.849465
29	M	102.4	36	6.88548	2.0103	0.837934
30	M	204	15	6.97714	2.30963	0.843678
30	M	204	25	8.46414	2.30963	0.927583
30	M	204	30	10.4717	2.30963	1.02002
30	M	204	36	15.7247	2.30963	1.19658
31	M	277.9	15	10.5365	2.44389	1.0227
31	M	277.9	25	14.5235	2.44389	1.16207
31	M	277.9	30	17.1202	2.44389	1.23351
31	M	277.9	36	26.7743	2.44389	1.42772
32	F	154.9	15	5.70694	2.19005	0.756403
32	F	154.9	25	7.13693	2.19005	0.853512
32	F	154.9	30	8.78023	2.19005	0.943506
32	F	154.9	36	12.3824	2.19005	1.0928
33	F	64.5	15	5.20148	1.80956	0.716127
33	F	64.5	25	6.56664	1.80956	0.817343
33	F	64.5	30	7.41233	1.80956	0.869955
33	F	64.5	36	9.48165	1.80956	0.976884
34	F	78	15	2.68646	1.89209	0.429181
34	F	78	25	5.42885	1.89209	0.734708
34	F	78	30	7.29544	1.89209	0.863052
35	F	78	36	9.66515	1.89209	0.985209
35	F	111.3	15	3.71004	2.0465	0.569379
35	F	111.3	25	7.87582	2.0465	0.896296
35	F	111.3	30	5.00234	2.0465	0.699173
35	F	111.3	36	10.4105	2.0465	1.01747
36	M	144.4	15	7.77337	2.15957	0.890609
36	M	144.4	25	9.06819	2.15957	0.957521
36	M	144.4	30	8.10578	2.15957	0.908795
36	M	144.4	36	10.4612	2.15957	1.01958
37	M	113.9	15	6.51133	2.05652	0.81367
37	M	113.9	25	7.09865	2.05652	0.851176
37	M	113.9	30	7.20623	2.05652	0.857708
37	M	113.9	36	8.46128	2.05652	0.927436
38	F	55.9	15	2.92531	1.74741	0.466172
38	F	55.9	25	6.17018	1.74741	0.790298
38	F	55.9	30	5.04483	1.74741	0.702847
38	F	55.9	36	9.40021	1.74741	0.973138
39	F	118.2	15	3.99124	2.07262	0.601108
39	F	118.2	25	6.13434	2.07262	0.787768
39	F	118.2	30	6.59983	2.07262	0.819533
39	F	118.2	36	12.3079	2.07262	1.09018
40	F	88.7	15	2.4743	1.94792	0.393453
40	F	88.7	25	5.14607	1.94792	0.711476
40	F	88.7	30	8.16016	1.94792	0.911699
40	F	88.7	36	9.18677	1.94792	0.963163
41	F	82.2	15	3.35923	1.91487	0.52624
41	F	82.2	25	5.51548	1.91487	0.741583
41	F	82.2	30	5.90924	1.91487	0.771532
41	F	82.2	36	7.81907	1.91487	0.893155

## Sheet: RMR C.lineata
Resting metabolic rates of Conopsis lineata
ID	Sex	Body mass (g)	Thermal treatment (°C)	Resting metabolic rate (CO2 ml/min)	log10 Body mass	log10 Resting metabolic rate
1	F	6.3	15	0.173747	0.799341	-0.760082
1	F	6.3	25	0.439036	0.799341	-0.3575
1	F	6.3	30	0.97869	0.799341	-0.0093548
1	F	6.3	33	0.954178	0.799341	-0.0203707
2	M	7.9	15	0.212764	0.897627	-0.672103
2	M	7.9	25	1.05794	0.897627	0.0244627
2	M	7.9	30	1.32808	0.897627	0.123224
2	M	7.9	33	1.82071	0.897627	0.260241
3	M	7	15	0.713436	0.845098	-0.146645
3	M	7	25	1.14941	0.845098	0.0604746
3	M	7	30	1.59967	0.845098	0.204031
3	M	7	33	1.75808	0.845098	0.245039
4	F	7.2	15	0.50464	0.857332	-0.297018
4	F	7.2	25	1.168	0.857332	0.0674421
4	F	7.2	30	1.47603	0.857332	0.169096
4	F	7.2	33	2.01373	0.857332	0.304001
5	F	2.7	15	0.319597	0.431364	-0.495397
5	F	2.7	25	0.538189	0.431364	-0.269065
5	F	2.7	30	0.657017	0.431364	-0.182423
5	F	2.7	33	0.866709	0.431364	-0.0621267
6	M	3.3	15	0.194518	0.518514	-0.711039
6	M	3.3	25	0.723541	0.518514	-0.140537
6	M	3.3	30	0.942573	0.518514	-0.0256849
6	M	3.3	33	1.25371	0.518514	0.0981964
7	F	8.8	15	0.197289	0.944483	-0.704897
7	F	8.8	25	0.9435	0.944483	-0.0252579
7	F	8.8	30	1.32562	0.944483	0.12242
7	F	8.8	33	1.49003	0.944483	0.173194
8	M	6.8	15	0.399149	0.832509	-0.398865
8	M	6.8	25	0.829239	0.832509	-0.0813201
8	M	6.8	30	1.12376	0.832509	0.0506743
8	M	6.8	33	1.40667	0.832509	0.148193
9	M	3.3	15	0.114732	0.518514	-0.940314
9	M	3.3	25	0.570863	0.518514	-0.243468
9	M	3.3	30	0.645576	0.518514	-0.190053
9	M	3.3	33	0.759118	0.518514	-0.119691
10	F	5.7	15	0.404921	0.755875	-0.39263
10	F	5.7	25	0.585432	0.755875	-0.232524
10	F	5.7	30	1.31991	0.755875	0.120546
10	F	5.7	33	1.40365	0.755875	0.147259
11	F	4.6	25	0.670571	0.662758	-0.173555
11	F	4.6	30	0.907507	0.662758	-0.0421499
11	F	4.6	33	1.12265	0.662758	0.0502452
12	M	3.1	15	0.425956	0.491362	-0.370635
12	M	3.1	25	0.669992	0.491362	-0.173931
12	M	3.1	30	0.966856	0.491362	-0.0146381
12	M	3.1	33	1.29734	0.491362	0.113054
13	F	8	15	0.373161	0.90309	-0.428104
13	F	8	25	1.13808	0.90309	0.0561739
13	F	8	30	1.23632	0.90309	0.0921323
13	F	8	33	1.45925	0.90309	0.164129
14	M	5.1	15	0.709875	0.70757	-0.148818
14	M	5.1	25	0.917958	0.70757	-0.0371773
14	M	5.1	30	1.10327	0.70757	0.0426826
14	M	5.1	33	1.30048	0.70757	0.114105
15	F	6.2	15	0.106768	0.792392	-0.971558
15	F	6.2	25	0.773019	0.792392	-0.11181
15	F	6.2	30	0.742155	0.792392	-0.129506
15	F	6.2	33	1.16437	0.792392	0.0660914
16	F	2.1	15	0.172109	0.322219	-0.764196
16	F	2.1	25	0.357373	0.322219	-0.446878
16	F	2.1	30	0.492252	0.322219	-0.307813
16	F	2.1	33	0.753062	0.322219	-0.123169
17	M	2.4	15	0.341838	0.380211	-0.46618
17	M	2.4	25	0.509802	0.380211	-0.292598
17	M	2.4	30	0.513856	0.380211	-0.289159
17	M	2.4	33	0.673408	0.380211	-0.171722
18	M	6.7	15	0.312042	0.826075	-0.505787
18	M	6.7	25	0.722188	0.826075	-0.14135
18	M	6.7	30	0.757146	0.826075	-0.12082
18	M	6.7	33	1.34711	0.826075	0.129403
19	F	2.1	15	0.326599	0.322219	-0.485985
19	F	2.1	25	0.393023	0.322219	-0.405582
19	F	2.1	30	0.597441	0.322219	-0.223705
19	F	2.1	33	0.711117	0.322219	-0.148059
19	F	2.1	36	1.27026	0.322219	0.103892
20	M	5.4	15	0.604257	0.732394	-0.218778
20	M	5.4	25	0.974233	0.732394	-0.0113372
20	M	5.4	30	1.76005	0.732394	0.245526
20	M	5.4	36	2.22254	0.732394	0.346849
21	NA	1.3	15	0.203148	0.113943	-0.692187
21	NA	1.3	25	0.222006	0.113943	-0.653635
21	NA	1.3	30	0.359706	0.113943	-0.444053
21	NA	1.3	33	0.364196	0.113943	-0.438664
21	NA	1.3	36	0.379525	0.113943	-0.420759
22	NA	1.5	15	0.0996425	0.176091	-1.00156
22	NA	1.5	25	0.477963	0.176091	-0.320606
22	NA	1.5	30	0.723575	0.176091	-0.140517
22	NA	1.5	36	0.665717	0.176091	-0.17671
23	F	6.4	15	0.254677	0.80618	-0.59401
23	F	6.4	25	0.998511	0.80618	-0.000647233
23	F	6.4	30	1.70147	0.80618	0.230824
23	F	6.4	36	1.75731	0.80618	0.24485
24	F	6.1	15	0.188232	0.78533	-0.725307
24	F	6.1	25	1.47239	0.78533	0.168023
24	F	6.1	30	1.81774	0.78533	0.259532
24	F	6.1	33	1.52243	0.78533	0.182538
24	F	6.1	36	2.7514	0.78533	0.439554
25	M	6.6	15	0.636262	0.819544	-0.196364
25	M	6.6	25	0.969382	0.819544	-0.013505
25	M	6.6	30	1.72972	0.819544	0.237976
25	M	6.6	33	2.05175	0.819544	0.312125
25	M	6.6	36	2.37479	0.819544	0.375625
26	F	5.1	15	0.619674	0.70757	-0.207837
26	F	5.1	25	1.86906	0.70757	0.271624
26	F	5.1	30	1.96274	0.70757	0.292864
26	F	5.1	36	3.03641	0.70757	0.48236

## Sheet: RMR T.melanogaster
Resting Metabolic Rate of Thamnophis melanogaster
ID	Sex	Body mass (g)	Thermal treatment (°C)	Resting metabolic rate (CO2 ml/min)	log10 Body mass	log10 Resting metabolic rate
1	NA	3	15	0.267593	0.477121	-0.572525
1	NA	3	25	0.29811	0.477121	-0.525623
1	NA	3	30	0.97811	0.477121	-0.0096123
1	NA	3	33	0.728927	0.477121	-0.137316
2	NA	3.1	15	0.14469	0.491362	-0.839561
2	NA	3.1	25	0.89746	0.491362	-0.0469849
2	NA	3.1	30	0.927595	0.491362	-0.0326416
2	NA	3.1	33	1.04523	0.491362	0.0192131
3	NA	4.9	15	0.593173	0.690196	-0.226819
3	NA	4.9	25	0.707447	0.690196	-0.150306
3	NA	4.9	30	1.23576	0.690196	0.0919345
3	NA	4.9	33	1.67074	0.690196	0.222909
4	F	7.2	15	0.53974	0.857332	-0.267815
4	F	7.2	25	0.691761	0.857332	-0.160044
4	F	7.2	30	2.08856	0.857332	0.319847
4	F	7.2	33	2.28407	0.857332	0.358709
5	M	7.4	15	0.215785	0.869232	-0.665979
5	M	7.4	25	1.21625	0.869232	0.0850243
5	M	7.4	30	2.03365	0.869232	0.308276
5	M	7.4	33	2.33883	0.869232	0.369
6	M	7.2	15	0.689023	0.857332	-0.161766
6	M	7.2	25	0.765742	0.857332	-0.115918
6	M	7.2	30	1.61595	0.857332	0.208429
6	M	7.2	33	1.87672	0.857332	0.273399
7	F	121.6	15	4.11552	2.08493	0.614425
7	F	121.6	25	7.53063	2.08493	0.876831
7	F	121.6	30	9.1215	2.08493	0.960066
7	F	121.6	33	10.5917	2.08493	1.02497
8	F	108	15	3.05312	2.03342	0.484744
8	F	108	25	7.15828	2.03342	0.854809
9	M	7.6	15	0.265512	0.880814	-0.575917
9	M	7.6	25	0.814267	0.880814	-0.089233
9	M	7.6	30	1.3348	0.880814	0.125417
9	M	7.6	33	2.03744	0.880814	0.309084
10	F	8.6	15	0.363937	0.934498	-0.438974
10	F	8.6	25	0.740498	0.934498	-0.130476
10	F	8.6	30	1.42159	0.934498	0.152774
10	F	8.6	33	1.83335	0.934498	0.263245
11	M	20.7	15	0.865693	1.31597	-0.0626361
11	M	20.7	25	1.394	1.31597	0.144263
11	M	20.7	30	2.70034	1.31597	0.431419
11	M	20.7	33	3.38133	1.31597	0.529088
12	F	56.4	15	2.03587	1.75128	0.30875
12	F	56.4	25	4.81417	1.75128	0.682521
12	F	56.4	30	4.5174	1.75128	0.654888
12	F	56.4	33	6.27554	1.75128	0.797651
13	M	76.9	15	2.10907	1.88593	0.324092
13	M	76.9	25	4.27449	1.88593	0.630885
13	M	76.9	30	5.75604	1.88593	0.760124
13	M	76.9	33	7.44056	1.88593	0.871606
14	M	44.8	15	1.76178	1.65128	0.245952
14	M	44.8	25	3.36145	1.65128	0.526526
14	M	44.8	30	4.4705	1.65128	0.650356
14	M	44.8	33	5.66031	1.65128	0.752841
15	M	9.8	15	0.226996	0.991226	-0.643982
15	M	9.8	25	1.11035	0.991226	0.0454607
15	M	9.8	30	1.58564	0.991226	0.200204
15	M	9.8	33	2.04802	0.991226	0.311334
16	F	36.5	15	1.36373	1.56229	0.134729
16	F	36.5	25	2.60663	1.56229	0.416079
16	F	36.5	30	4.45257	1.56229	0.648611
16	F	36.5	33	4.16409	1.56229	0.61952
17	F	48.5	15	1.34814	1.68574	0.129734
17	F	48.5	25	3.29513	1.68574	0.517872
17	F	48.5	30	5.8668	1.68574	0.768402
17	F	48.5	33	5.89593	1.68574	0.770553
18	F	48.5	36	7.46313	1.68574	0.872921
18	F	52.7	15	2.11112	1.72181	0.324513
18	F	52.7	25	3.40719	1.72181	0.532396
18	F	52.7	30	5.48931	1.72181	0.739518
18	F	52.7	33	6.7063	1.72181	0.826483
19	F	52.7	36	11.1329	1.72181	1.04661
19	F	49.3	15	2.01626	1.69285	0.304545
19	F	49.3	25	3.53443	1.69285	0.54832
19	F	49.3	30	5.07375	1.69285	0.705329
19	F	49.3	33	6.00326	1.69285	0.778388
20	F	49.3	36	8.64966	1.69285	0.936999
20	NA	2.8	15	0.260992	0.447158	-0.583373
20	NA	2.8	25	0.421119	0.447158	-0.375595
20	NA	2.8	30	0.450457	0.447158	-0.346347
20	NA	2.8	33	0.794337	0.447158	-0.0999952
20	NA	2.8	36	1.10442	0.447158	0.0431335
21	F	5.3	15	0.134472	0.724276	-0.871368
21	F	5.3	25	0.604472	0.724276	-0.218624
21	F	5.3	30	2.69694	0.724276	0.430871
21	F	5.3	33	1.57581	0.724276	0.197504
21	F	5.3	36	1.60229	0.724276	0.204741
22	M	26.8	15	1.48088	1.42813	0.170519
22	M	26.8	25	1.81366	1.42813	0.258555
22	M	26.8	30	2.34715	1.42813	0.37054
22	M	26.8	33	4.52606	1.42813	0.655721
22	M	26.8	36	6.03446	1.42813	0.780638
23	NA	1.8	15	0.173034	0.255273	-0.761869
23	NA	1.8	25	0.346735	0.255273	-0.460002
23	NA	1.8	30	0.590848	0.255273	-0.228524
23	NA	1.8	33	1.06389	0.255273	0.0268959
23	NA	1.8	36	1.95516	0.255273	0.291182
24	NA	3.9	15	0.353137	0.591065	-0.452057
24	NA	3.9	25	0.408796	0.591065	-0.388493
24	NA	3.9	30	1.66938	0.591065	0.222554
24	NA	3.9	33	1.79133	0.591065	0.253175
24	NA	3.9	36	1.81562	0.591065	0.259024
25	NA	2.5	15	0.209586	0.39794	-0.678638
25	NA	2.5	25	0.256386	0.39794	-0.591106
25	NA	2.5	30	0.846677	0.39794	-0.0722822
25	NA	2.5	33	1.46376	0.39794	0.165469
25	NA	2.5	36	1.11973	0.39794	0.0491149
26	NA	4.2	15	0.267337	0.623249	-0.572941
26	NA	4.2	25	0.532951	0.623249	-0.273313
26	NA	4.2	30	0.968671	0.623249	-0.0138237
26	NA	4.2	33	1.21651	0.623249	0.085115
26	NA	4.2	36	1.56865	0.623249	0.195526
27	F	6.6	15	0.175932	0.819544	-0.754655
27	F	6.6	25	0.477698	0.819544	-0.320847
27	F	6.6	30	1.43923	0.819544	0.15813
27	F	6.6	33	2.06503	0.819544	0.314927
27	F	6.6	36	2.2075	0.819544	0.3439
28	M	5.4	15	0.190575	0.732394	-0.719934
28	M	5.4	25	0.781752	0.732394	-0.106931
28	M	5.4	30	1.52464	0.732394	0.183166
28	M	5.4	33	1.5387	0.732394	0.187154
28	M	5.4	36	2.21723	0.732394	0.345811
29	F	55.4	15	2.51847	1.74351	0.401137
29	F	55.4	25	3.18962	1.74351	0.503739
29	F	55.4	30	4.10875	1.74351	0.61371
29	F	55.4	33	4.94656	1.74351	0.694303
29	F	55.4	36	6.77311	1.74351	0.830788
30	M	27.5	15	0.791698	1.43933	-0.101441
30	M	27.5	25	2.66806	1.43933	0.426196
30	M	27.5	30	2.74052	1.43933	0.437833
30	M	27.5	36	3.36084	1.43933	0.526448
31	F	16.3	15	1.49329	1.21219	0.174145
31	F	16.3	25	4.67629	1.21219	0.669902
31	F	16.3	30	5.52803	1.21219	0.74257
31	F	16.3	36	6.41938	1.21219	0.807493
32	F	12.9	15	0.994219	1.11059	-0.00251816
32	F	12.9	25	2.86539	1.11059	0.457184
32	F	12.9	30	4.60729	1.11059	0.663445
32	F	12.9	36	5.178	1.11059	0.714162
33	M	16.3	15	0.518153	1.21219	-0.285542
33	M	16.3	25	2.83791	1.21219	0.452998
33	M	16.3	30	3.8757	1.21219	0.58835
33	M	16.3	36	4.91381	1.21219	0.691418
34	F	66.9	15	0.894612	1.82543	-0.0483653
34	F	66.9	25	5.4405	1.82543	0.735639
34	F	66.9	30	6.79814	1.82543	0.83239
34	F	66.9	36	10.1107	1.82543	1.00478
35	M	42.4	15	1.89093	1.62737	0.276676
35	M	42.4	25	4.42222	1.62737	0.645641
35	M	42.4	30	5.23724	1.62737	0.719103
35	M	42.4	36	8.62296	1.62737	0.935656
36	M	55.2	15	1.59919	1.74194	0.203901
36	M	55.2	25	4.43195	1.74194	0.646595
36	M	55.2	30	5.17157	1.74194	0.713623
36	M	55.2	36	9.0959	1.74194	0.958846
